# Supplementary material
Source: PubMed Central journal article supplement (PMC4220764)
Supplement: CJN.04140414_CJN04140414SupplementaryData.pdf [file CJN.04140414_CJN04140414SupplementaryData.pdf]

Supplementary Figure

**A**

V Q L K S X  
↓

agTACAACTGAAGAGTTGAGTAGTTGCTACAGAGACTGGATGGTCCACAAAGCC  
TAAAGTATTTACTCTGGTCCTTTACACAAAAGGCTTACCAATACCTGGGCTAGGgt

**B**

D C R F T Q D T Y X  
↓

agATTGCAGATTCACACAAGATACATACTGAGGGAAGTCTTAGAAGAAGAGAGGG  
CAGCCTGGAGCACGAAATATTGgt

**C**

V V H F C L X  
↓

agGTTGTACATTTTTGTTTGTGACAATTGGTCCTGCACTTTTGAGTGAAGGAAAT  
AATGTTTGATAACTGCTAGAAGAATCTACCAGAAAAGATTGTGATTTCTGCTTT  
CCTGTAACTTTTTGGGgt

**D**

G Q Q R N H Y K F X  
↓

agGTCAACAGAGGAACCATTATAAGTTTTGAGCACTACGAATTCAAAAATGTAA  
TGCAGTTAGAAGATGGAATCTGCTATCAGCATgtaag

**Supplementary Figure. Alignment of mutation-induced cryptic exons**  
**(A)** Patient ID 19. **(B)** Patient ID 48. **(C)** Patient ID 126. **(D)** Patient ID 217.  
All cryptic exons contained stop codons, meaning they are truncating mutations.
